# Supplementary material for: Exploring the catalytic mechanism of the 10–23 DNAzyme: insights from pH–rate profiles
Source: Royal Society of Chemistry journal article supplement (doi:10.1039/d4ob01125b), 2024-01-01
Supplement: d4ob01125b1.xlsx [file d4ob01125b1.xlsx]

## Sheet: pH-Mg-10-23E
Cofactor	[Metal] in reaction	pH-Buffer	kobs	Average	Standard deviation
Mg2+	10 mM	4.5	0.000295026	0.000250592	6.293e-05
			0.000206158
Mg2+	10 mM	5	0.000919101	0.00145982	0.000313
			0.00168
			0.00148
			0.00167
			0.00155
Mg2+	10 mM	5.5	0.00401	0.00343667	0.000667
			0.00423
			0.00363
			0.00239
			0.00313
			0.00323
Mg2+	10 mM	6	0.01447	0.0138633	0.0011
			0.01259
			0.01453
Mg2+	10 mM	6.5	0.03802	0.0388467	0.00085
			0.03968
			0.03884
Mg2+	10 mM	7	0.11833	0.11915	0.00876
			0.12744
			0.12339
			0.12204
			0.10455
Mg2+	10 mM	7.5	0.22572	0.21982	0.01482
			0.22312
			0.20047
			0.20292
			0.23704
			0.22965
Mg2+	10 mM	8	0.58063	0.595812	0.03625
			0.62155
			0.64147
			0.54911
			0.5863
Mg2+	10 mM	8.5	1.30386	1.41871	0.13854
			1.26485
			1.56587
			1.59531
			1.44
			1.3424
Mg2+	10 mM	9	2.99028	3.97528	0.81198
			5.01546
			4.36632
			3.48115
			3.34878
			4.64972

## Sheet: pH-Mg-10-23G14AP
Cofactor	[Metal] in reaction	pH-Buffer	kobs	Average	Standard deviation
Mg2+	10 mM	4.5	3.3143e-05	8.90295e-05	5.4e-05
			9.26366e-05
			0.000141309
Mg2+	10 mM	5	0.000119895	0.000123863	5.66e-06
			0.000127832
Mg2+	10 mM	5.5	0.000205744	0.000205131	7.07e-07
			0.000204518
Mg2+	10 mM	6	0.000189746	0.000255799	4.66e-05
			0.000267487
			0.000265551
			0.000300412
Mg2+	10 mM	6.5	0.00026691	0.000264753	6.03e-06
			0.000256268
			0.00027044
			0.000265394
Mg2+	10 mM	7	0.000246023	0.000250696	1.05e-05
			0.000254673
			0.000238611
			0.000263477
Mg2+	10 mM	7.5	0.000304751	0.000258132	3.61e-05
			0.000267547
			0.000225872
			0.000234359
Mg2+	10 mM	8	0.000283006	0.000259954	2.02e-05
			0.000252135
			0.000244721
Mg2+	10 mM	8.5	0.000259828	0.000269823	2.36e-05
			0.000252533
			0.000297109

## Sheet: pH- Pb-10-23E
Cofactor	[Metal] in reaction	Ph-Buffer	kobs	Average	Standard deviation
Pb2+	10 mM	4.5	0.00118	0.00133	0.000141
			0.00127
			0.00151
			0.00136
Pb2+	10 mM	5	0.01163	0.0115	0.000141
			0.01137
Pb2+	10 µM	5.5	0.07002	0.08795	0.02977
			0.07149
			0.12234
Pb2+	10 µM	6	0.56512	0.5513	0.06066
			0.48509
			0.60369
Pb2+	10 µM	6.5	1.84321	1.82982	0.1486
			1.99142
			1.85324
			1.63141
Pb2+	10 µM	7	3.5141	3.43415	0.1131
			3.35419
Pb2+	10 µM	7.5	2.10609	5.03821	2.0606
			6.48755
			6.46537
			5.09383
Pb2+	10 µM	8	1.91869	2.28912	0.2619
			2.5234
			2.4984
			2.40315
			2.42838
			1.91296
			2.33883
Pb2+	10 µM	8.5	1.22929	1.23535	0.011
			1.2482
			1.22855

## Sheet: pH-Pb-10-23G14-AP
Cofactor	[Metal] in reaction	Ph-Buffer	kobs	Average	Standard deviation
Pb2+	25 µM	5	0.00133	0.001302	0.000104
			0.00116
			0.00139
			0.00123
			0.0014
Pb2+	25 µM	5.5	0.0072	0.0088	0.0014
			0.00978
			0.00942
Pb2+	25 µM	5.75	0.00995	0.0102275	0.000671
			0.00941
			0.01073
			0.01082
Pb2+	25 µM	6	0.01464	0.01185	0.00238
			0.0114
			0.01246
			0.0089
Pb2+	25 µM	6.5	0.01131	0.0120275	0.0014
			0.01144
			0.01412
			0.01124
Pb2+	25 µM	7	0.01077	0.010515	0.000487
			0.01004
			0.01018
			0.01107
Pb2+	25 µM	7.25	0.00663	0.007624	0.00107
			0.00646
			0.00903
			0.00806
			0.00794
Pb2+	25 µM	7.5	0.00641	0.005855	0.000867
			0.00583
			0.00464
			0.00654

## Sheet: Pb2+ titration
Cofactor	[Metal] in reaction	kobs	Average	Standard deviation
Pb2+	400 µM	4.12588	4.44	0.2533
		4.46144
		4.44438
		4.74609
Pb2+	250 µM	4.00905	3.93	0.1202
		3.84421
Pb2+	150 µM	2.85385	2.87	0.0153
		2.87038
		2.88025
Pb2+	75 µM	1.14136	1.93	0.6225
		1.3301
		2.006
		2.784
		2.39656
Pb2+	25 µM	1.25676	1.14	0.0823
		1.23073
		1.0987
		1.0588
		1.10664
		1.09277
Pb2+	10 µM	0.27099	0.29	0.1042
		0.44247
		0.19796
		0.25168
