# Supplementary material for: Exploring the catalytic mechanism of the 10–23 DNAzyme: insights from pH–rate profiles
Source: Royal Society of Chemistry journal article supplement (doi:10.1039/d4ob01125b), 2024-01-01
Supplement: d4ob01125b2.pdf [file d4ob01125b2.pdf]

## Supplementary Information

### Exploring the Catalytic Mechanism of the 10-23 DNAzyme: Insights from pH-Rate Profiles

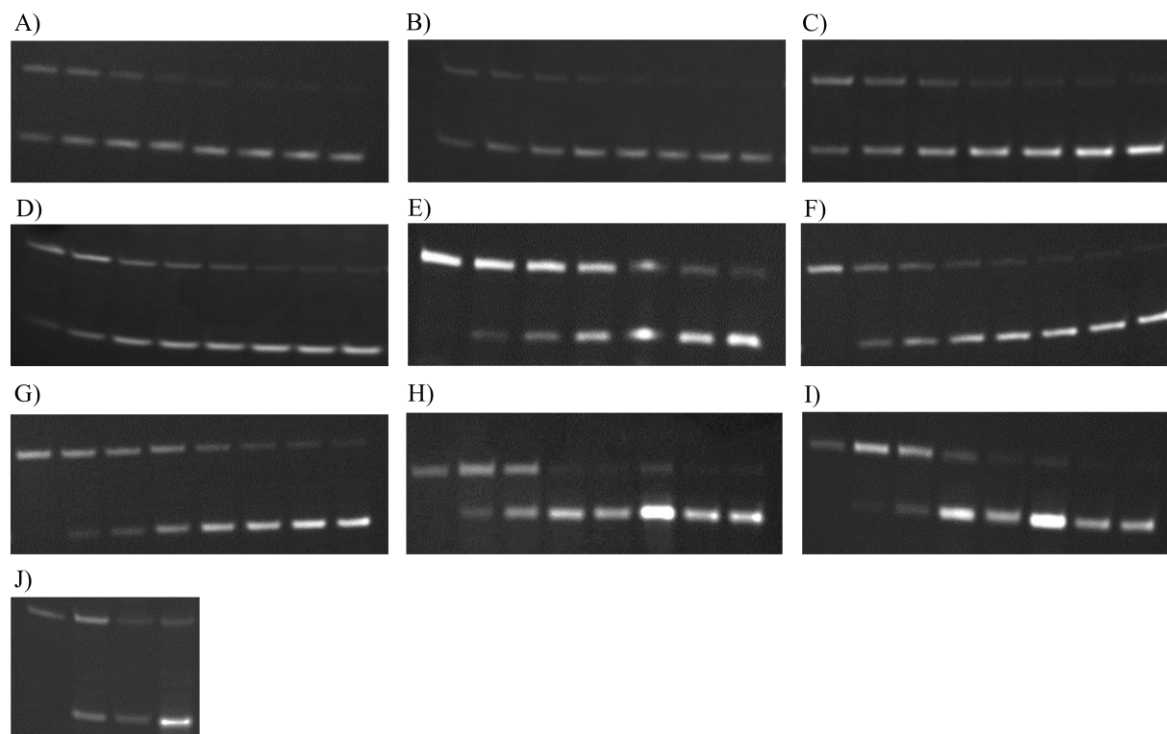

**Figure S1.** Representative PAGE image of activity assays of the 10-23 DNAzyme with its 5'-FAM labelled substrate with 10 mM  $Mg^{2+}$ , measured at different pH values. A) pH 9.0, B) pH 8.5, C) 8.0, D) 7.5, E) 7.0, F) 6.5, G) 6.0, H) 5.5, I)5.0 and J) 4.5.

All gel images were capture in the gel doc system XRQ G:Box Chemi (Synegen) and quantified with the Genesys Tools software.

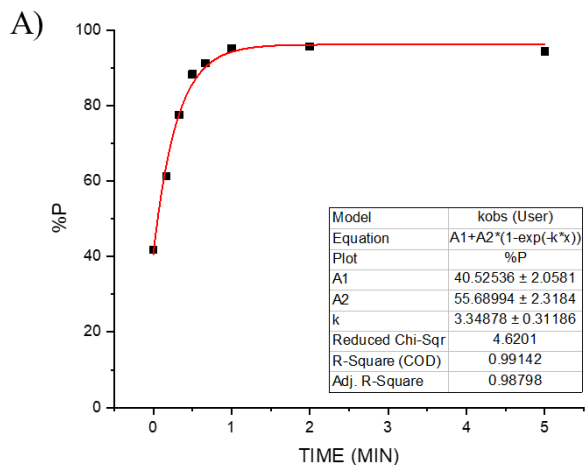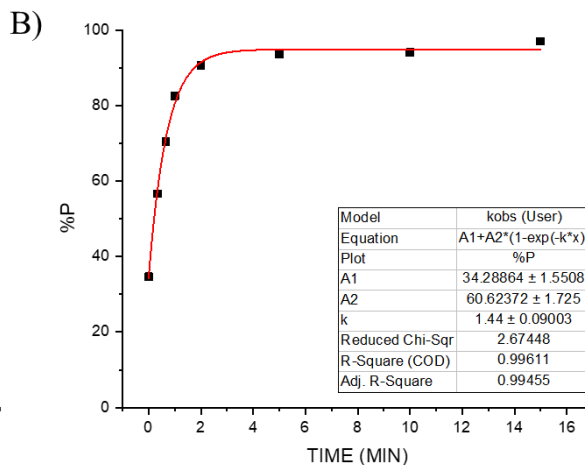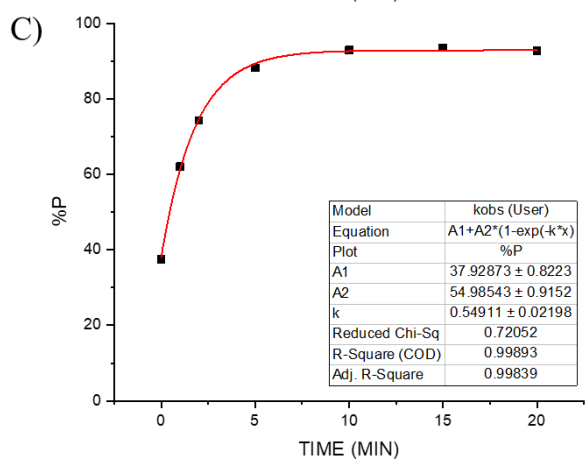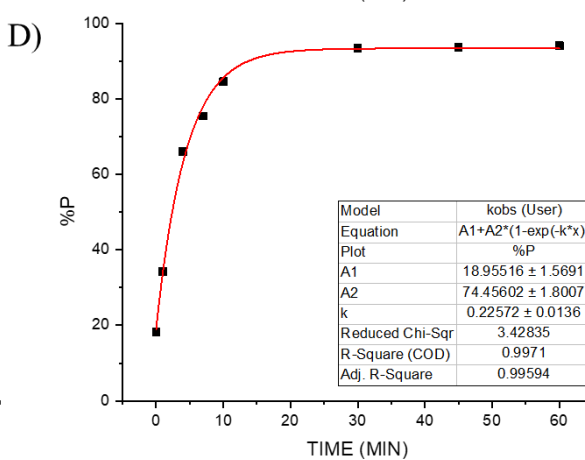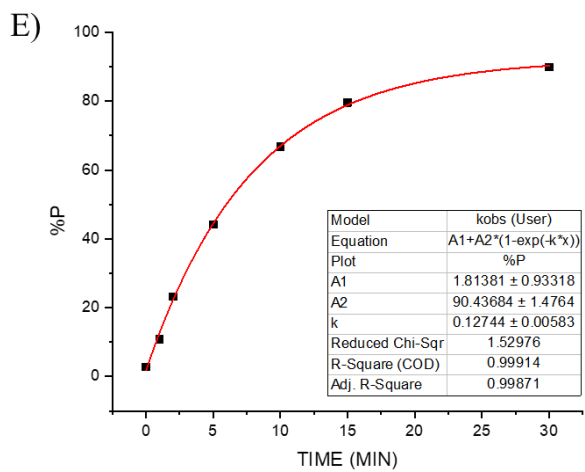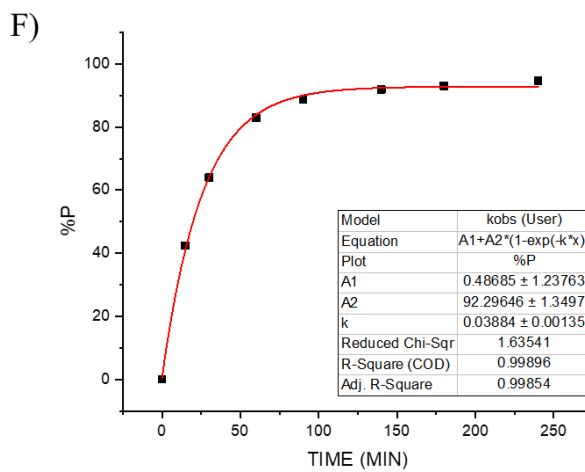

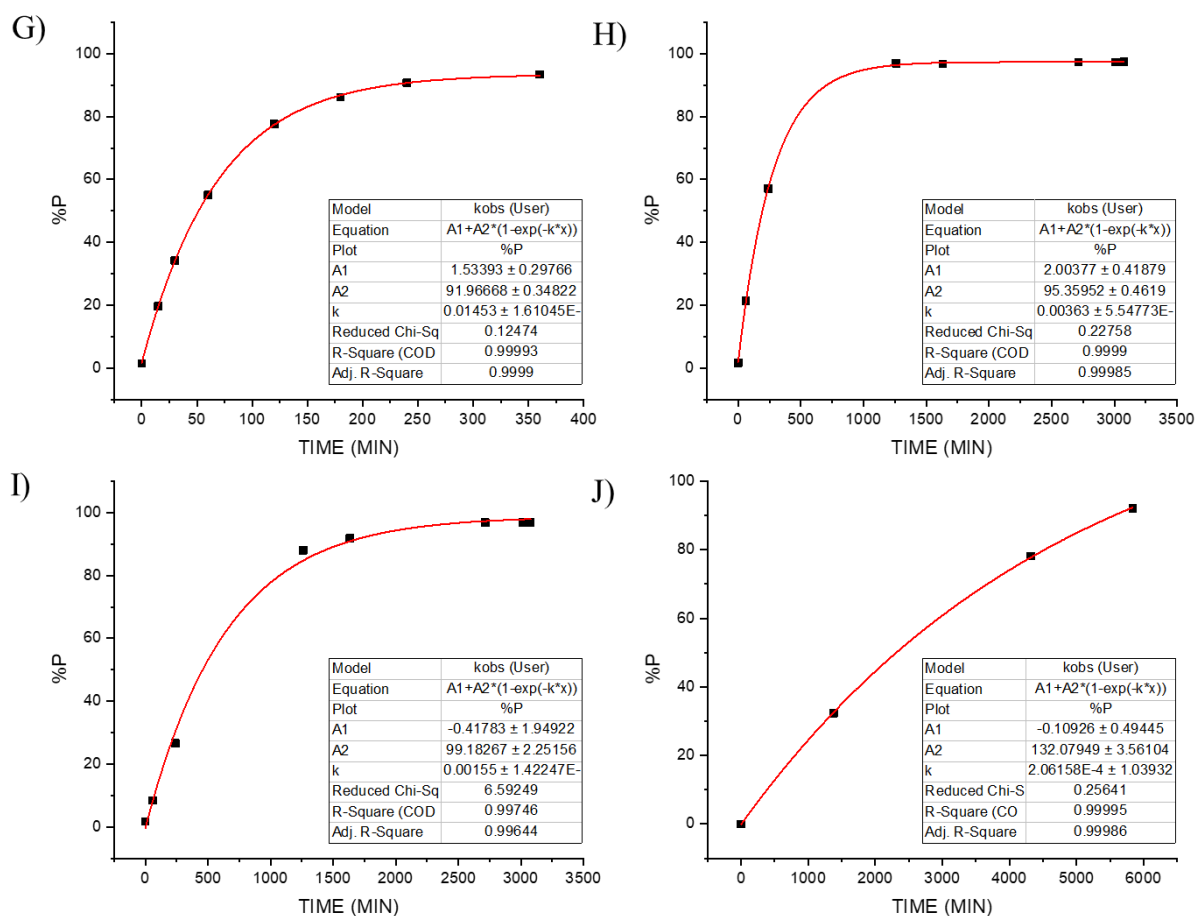

**Figure S2.** Representative activity assays of the 10-23 DNAzyme with its 5'-FAM labelled substrate with 10 mM Mg<sup>2+</sup>, measured at different pH values. Every point is calculated as the % of product formed for each time collected. Data are quantified from the PAGE image shown in Figure S1. A) pH 9.0, B) pH 8.5, C) 8.0, D) 7.5, E) 7.0, F) 6.5, G) 6.0, H) 5.5, I) 5.0 and J) 4.5.

Kinetic plots were fitted according to the equation (1):  $P = \% P_0 + \% P_\infty (1 - e^{-kt})$ , where  $\% P_0$  is the initial amount of product (at time,  $t = 0$ ),  $\% P_\infty$  is the amount of product formed at the endpoint plus the initial amount of product of the reaction (at  $t = \infty$ ),  $P$  is the amount of product at time  $t$ , and  $k$  is the observed constant rate.

**Table S1.** Observed rate constant obtained from the activity assays of the 10-23 DNase in presence of 10 mM Mg<sup>2+</sup>, measured at different pH values. Average value and standard deviation are provided.

| <b>pH</b> | <b>k<sub>obs</sub></b> | <b>Average k<sub>obs</sub></b> | <b>Standard deviation</b> |
|-----------|------------------------|--------------------------------|---------------------------|
| 4.50      | 0.000295               | 0.000251                       | 0.0000629                 |
|           | 0.000206               |                                |                           |
| 5.00      | 0.00092                | 0.00146                        | 0.000313                  |
|           | 0.00168                |                                |                           |
|           | 0.00148                |                                |                           |
|           | 0.00167                |                                |                           |
|           | 0.00155                |                                |                           |
| 5.50      | 0.00401                | 0.00344                        | 0.000667                  |
|           | 0.00423                |                                |                           |
|           | 0.00363                |                                |                           |
|           | 0.00239                |                                |                           |
|           | 0.00313                |                                |                           |
|           | 0.00323                |                                |                           |
| 6.00      | 0.0145                 | 0.0139                         | 0.00110                   |
|           | 0.0126                 |                                |                           |
|           | 0.0145                 |                                |                           |
| 6.50      | 0.0380                 | 0.0388                         | 0.00085                   |
|           | 0.0397                 |                                |                           |
|           | 0.0388                 |                                |                           |
| 7.00      | 0.1183                 | 0.1192                         | 0.00876                   |
|           | 0.1274                 |                                |                           |
|           | 0.1234                 |                                |                           |
|           | 0.1220                 |                                |                           |
|           | 0.1046                 |                                |                           |
| 7.50      | 0.2257                 | 0.2198                         | 0.01482                   |
|           | 0.2231                 |                                |                           |
|           | 0.2005                 |                                |                           |
|           | 0.2029                 |                                |                           |
|           | 0.2370                 |                                |                           |
|           | 0.2297                 |                                |                           |
| 8.00      | 0.5806                 | 0.5958                         | 0.03625                   |
|           | 0.6216                 |                                |                           |
|           | 0.6415                 |                                |                           |
|           | 0.5491                 |                                |                           |
|           | 0.5863                 |                                |                           |
| 8.50      | 1.3039                 | 1.4187                         | 0.13854                   |
|           | 1.2649                 |                                |                           |
|           | 1.5659                 |                                |                           |
|           | 1.5953                 |                                |                           |
|           | 1.4400                 |                                |                           |
|           | 1.3424                 |                                |                           |
| 9.00      | 2.9903                 | 3.9753                         | 0.81198                   |
|           | 5.0155                 |                                |                           |
|           | 4.3663                 |                                |                           |
|           | 3.4812                 |                                |                           |
|           | 3.3488                 |                                |                           |
|           | 4.6497                 |                                |                           |

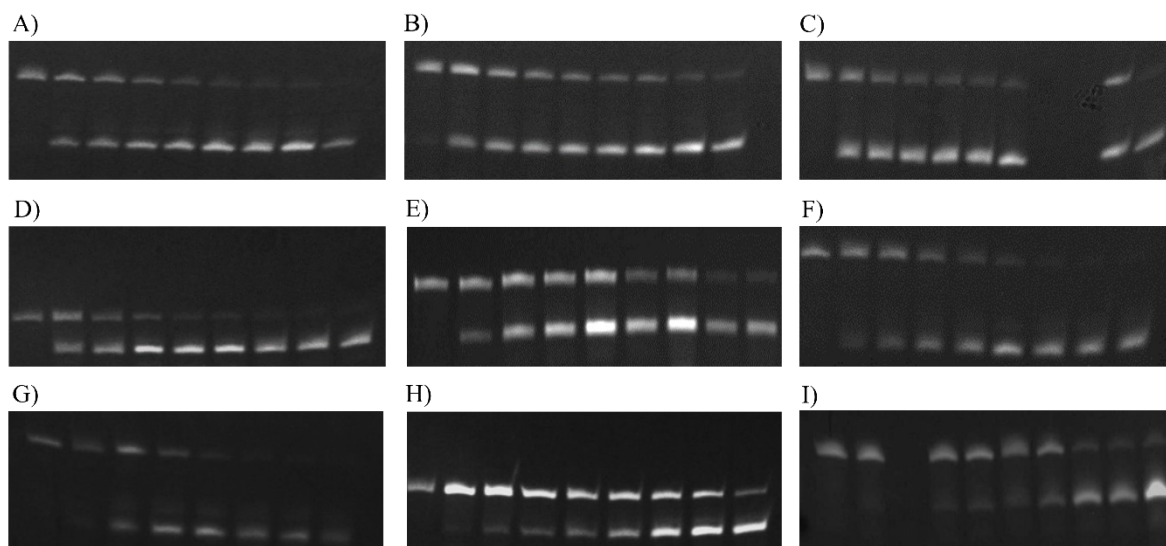

**Figure S3.** Representative PAGE image of activity assays of the 10-23 DNazyme with its 5'-FAM labelled substrate with  $10 \mu\text{M Pb}^{2+}$ , measured at different pH values. A) pH 8.5, B) 8.0, C) 7.5, D) 7.0, E) 6.5, F) 6.0, G) 5.5, H) 5.0 and I) 4.5.

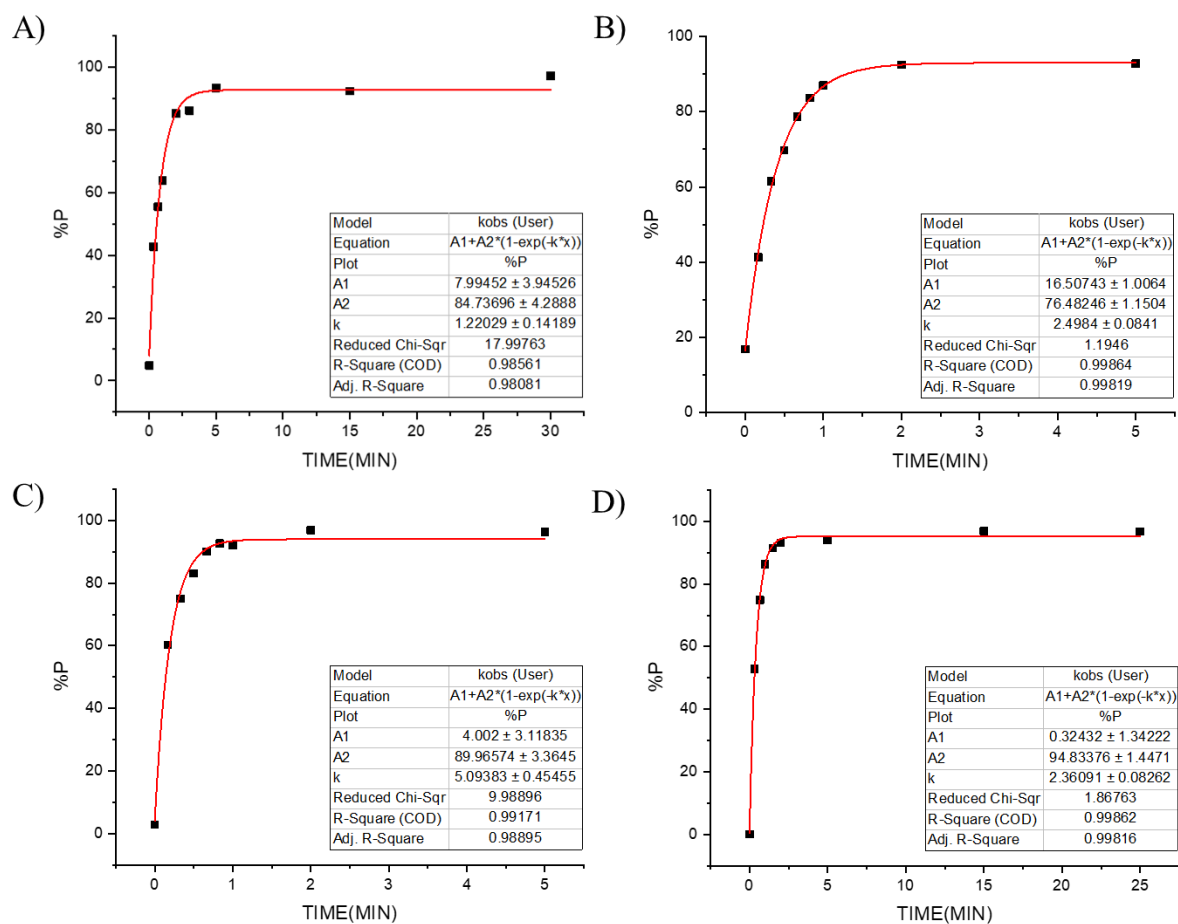

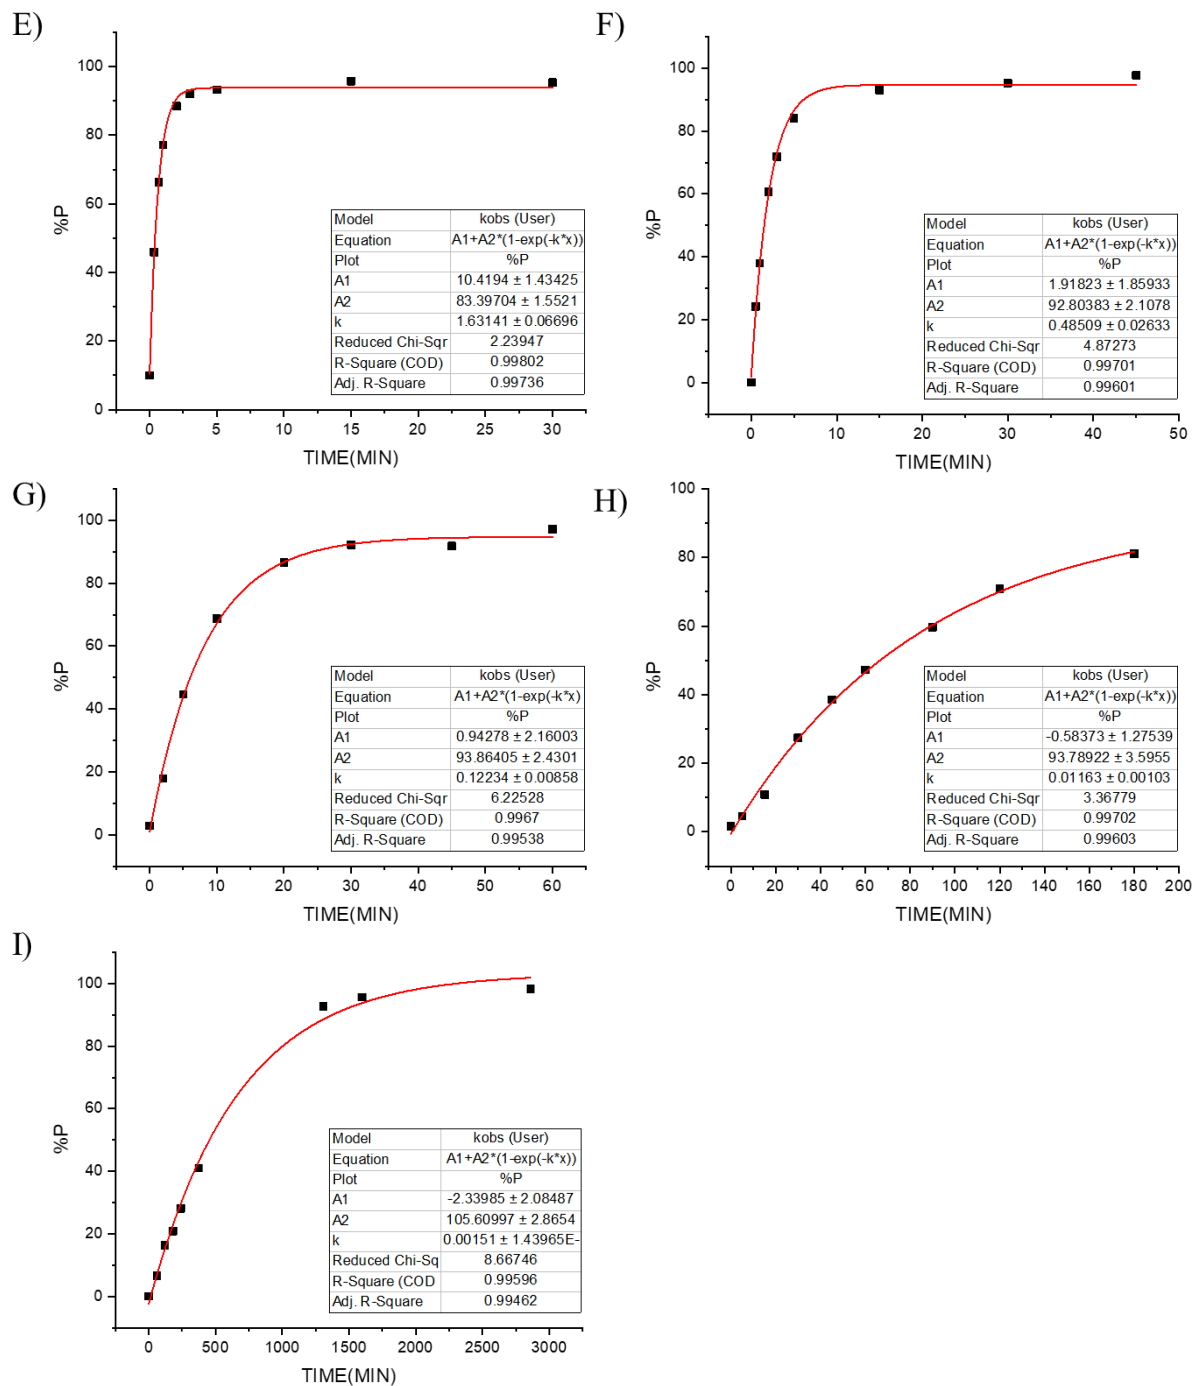

**Figure S4.** Representative activity assays of the 10-23 DNazyme with its 5'-FAM labelled substrate with  $10 \mu\text{M Pb}^{2+}$ , measured at different pH values. Every point is calculated as the % of product formed for each time collected. Data are quantified from the PAGE image shown in Figure S3. A) pH 8.5, B) 8.0, C) 7.5, D) 7.0, E) 6.5, F) 6.0, G) 5.5, H) 5.0 and I) 4.5.

**Table S2.** Observed rate constant of the 10-23 DNase in presence of 10  $\mu\text{M}$   $\text{Pb}^{2+}$ , measured at different pH values. Average value and standard deviation are provided.

| <b>pH</b> | <b>k<sub>obs</sub></b> | <b>Average k<sub>obs</sub></b> | <b>Standard deviation</b> |
|-----------|------------------------|--------------------------------|---------------------------|
| 4.50      | 0.00118                | 0.00133                        | 0.000141                  |
|           | 0.00127                |                                |                           |
|           | 0.00151                |                                |                           |
|           | 0.00136                |                                |                           |
| 5.00      | 0.0116                 | 0.0115                         | 0.000141                  |
|           | 0.0114                 |                                |                           |
| 5.50      | 0.0700                 | 0.0880                         | 0.0298                    |
|           | 0.0715                 |                                |                           |
|           | 0.1223                 |                                |                           |
| 6.00      | 0.565                  | 0.551                          | 0.0607                    |
|           | 0.485                  |                                |                           |
|           | 0.604                  |                                |                           |
| 6.50      | 1.843                  | 1.830                          | 0.1486                    |
|           | 1.991                  |                                |                           |
|           | 1.853                  |                                |                           |
|           | 1.631                  |                                |                           |
| 7.00      | 3.514                  | 3.434                          | 0.1131                    |
|           | 3.354                  |                                |                           |
| 7.50      | 2.106                  | 5.038                          | 2.0606                    |
|           | 6.488                  |                                |                           |
|           | 6.465                  |                                |                           |
|           | 5.094                  |                                |                           |
| 8.00      | 1.919                  | 2.289                          | 0.2619                    |
|           | 2.523                  |                                |                           |
|           | 2.498                  |                                |                           |
|           | 2.403                  |                                |                           |
|           | 2.428                  |                                |                           |
|           | 1.913                  |                                |                           |
| 8.50      | 2.339                  | 1.235                          | 0.0110                    |
|           | 1.229                  |                                |                           |
|           | 1.248                  |                                |                           |
|           | 1.229                  |                                |                           |

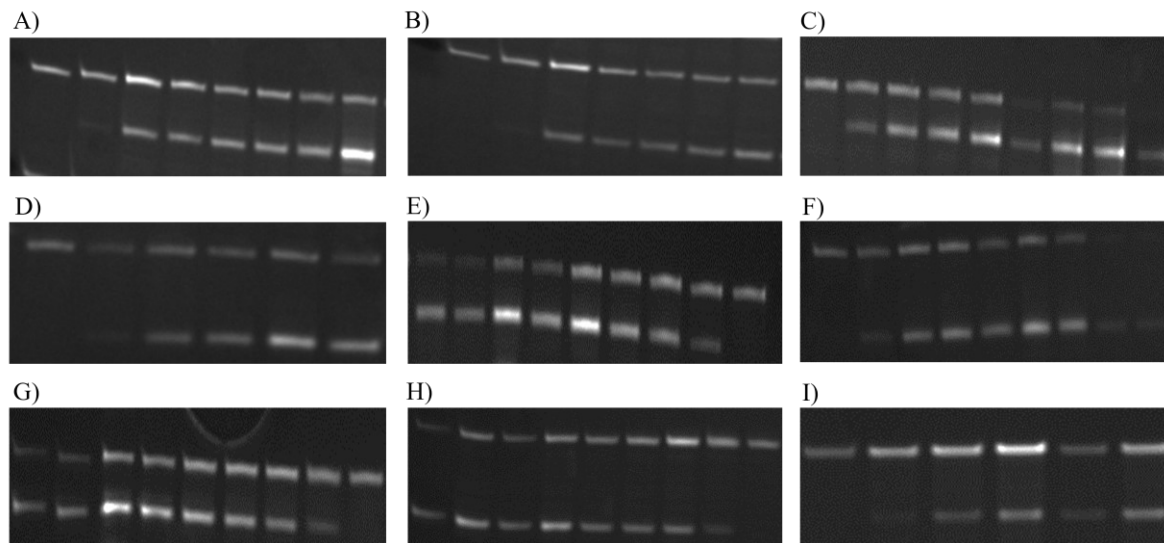

**Figure S5.** Representative PAGE image of activity assays of the 10-23 G14AP DNAzyme variant with its 5'-FAM labelled substrate with 10 mM Mg<sup>2+</sup>, measured at different pH values. A) pH 8.5, B) 8.0, C) 7.5, D) 7.0, E) 6.5, F) 6.0, G) 5.5, H) 5.0 and I) 4.5.

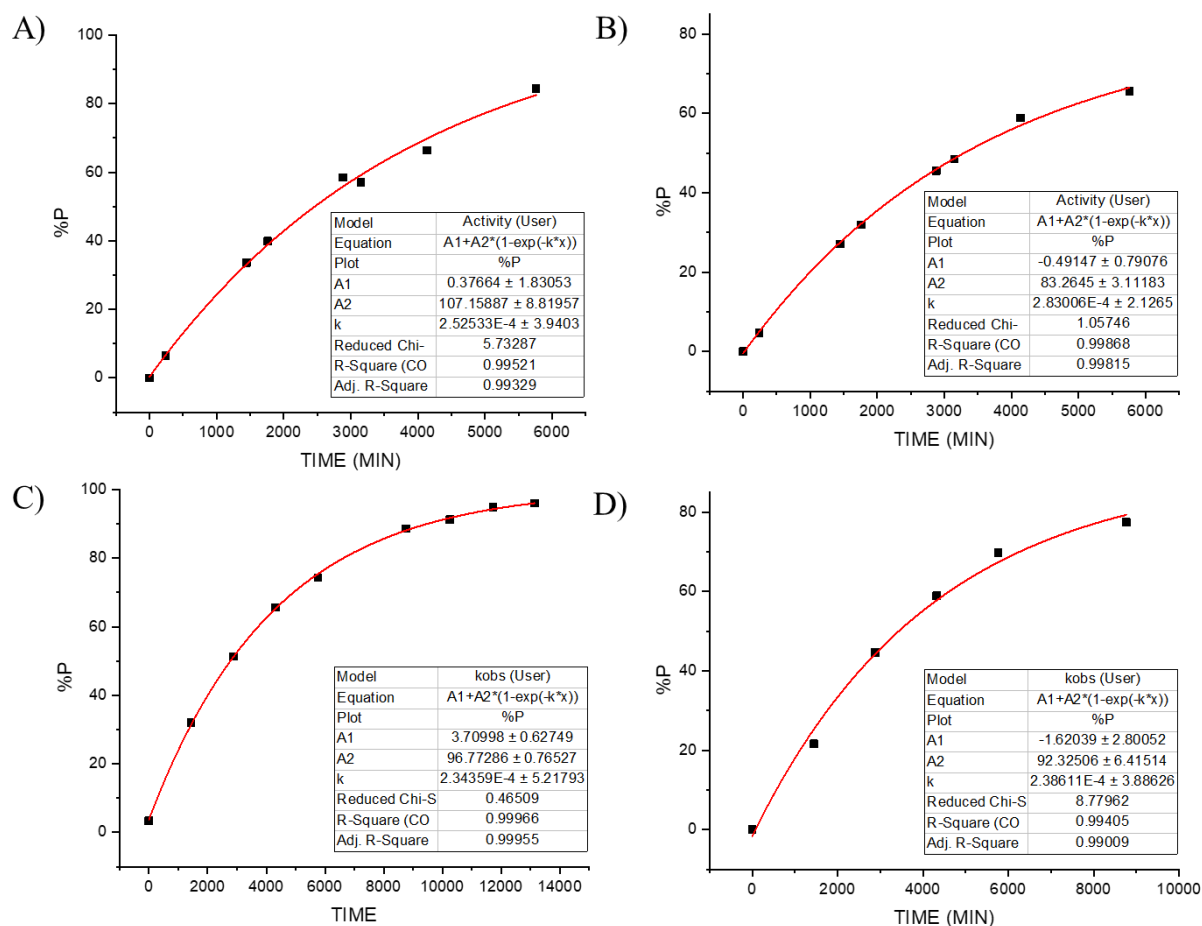



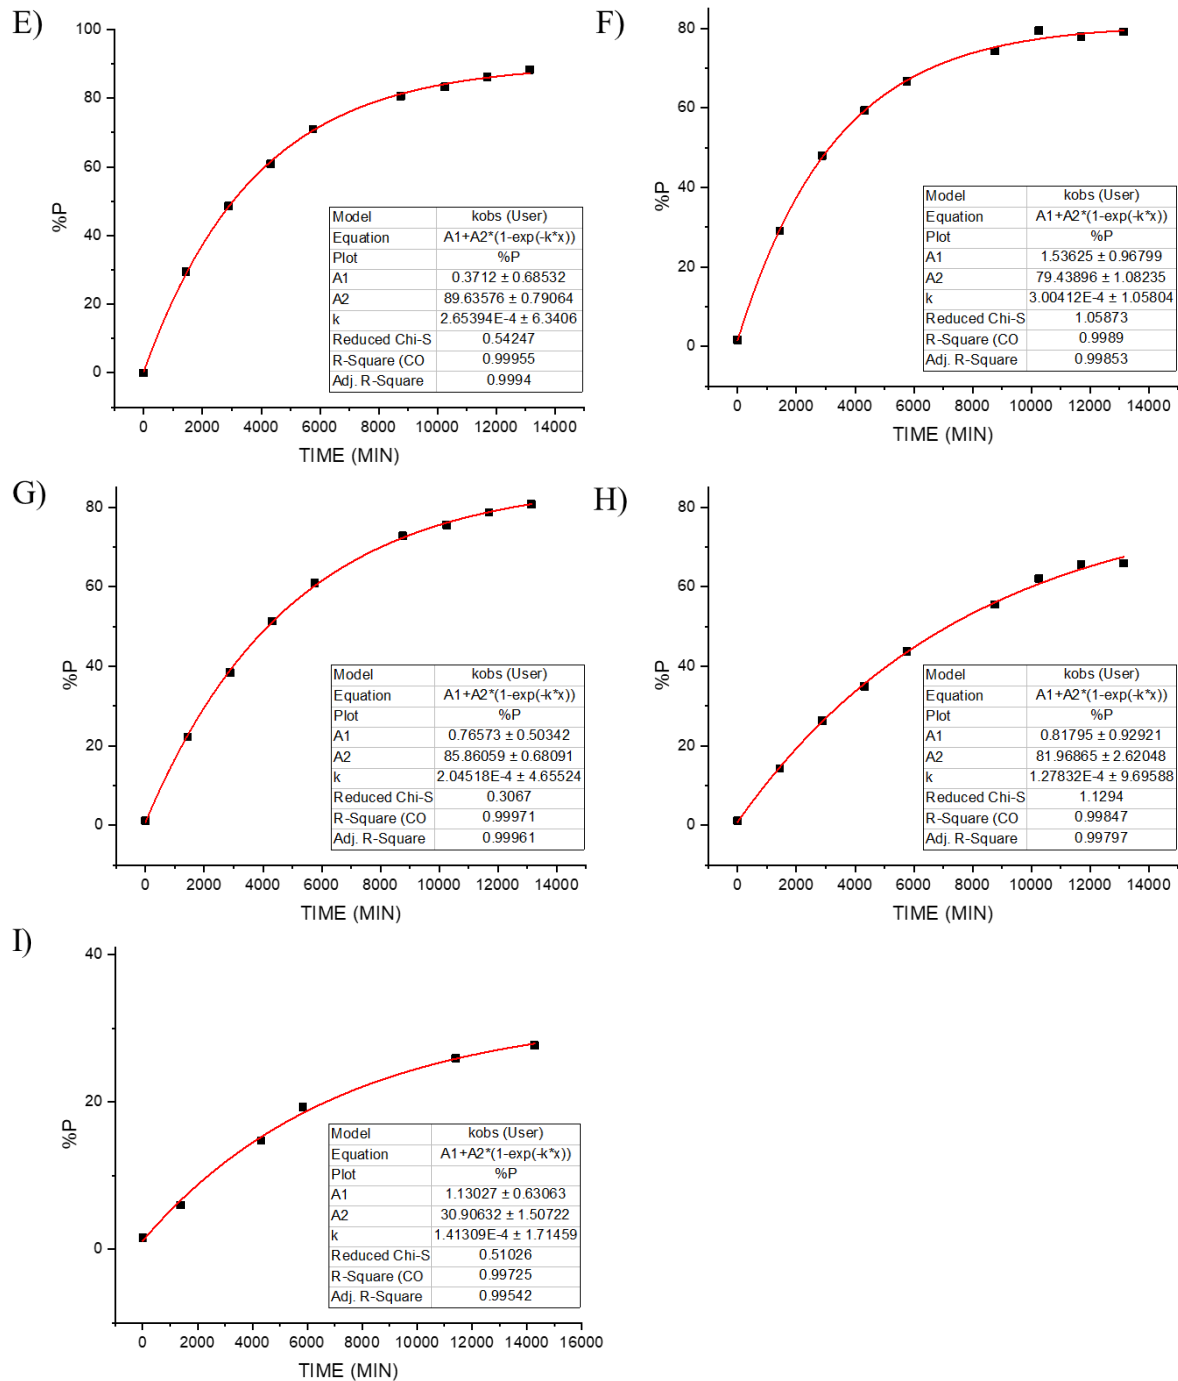

**Figure S6.** Representative activity assays of the 10-23 G14AP DNase variant with its 5'-FAM labelled substrate with 10 mM  $Mg^{2+}$ , measured at different pH values. Every point is calculated as the % of product formed for each time collected. Data are quantified from the PAGE image shown in Figure S5. A) pH 8.5, B) 8.0, C) 7.5, D) 7.0, E) 6.5, F) 6.0, G) 5.5, H) 5.0 and I) 4.5.

**Table S3.** Observed rate constant of the 10-23 G14AP DNAzyme variant in presence of 10 mM  $Mg^{2+}$ , measured at different pH values. Average value and standard deviation are provided.

| pH   | $k_{obs}$ | Average $k_{obs}$ | Standard deviation |
|------|-----------|-------------------|--------------------|
| 4.50 | 3.31E-05  | 8.90E-05          | 5.40E-05           |
|      | 9.26E-05  |                   |                    |
|      | 1.41E-04  |                   |                    |
| 5.00 | 1.20E-04  | 1.24E-04          | 5.66E-06           |
|      | 1.28E-04  |                   |                    |
| 5.50 | 2.06E-04  | 2.05E-04          | 7.07E-07           |
|      | 2.05E-04  |                   |                    |
| 6.00 | 1.90E-04  | 2.56E-04          | 4.66E-05           |
|      | 2.67E-04  |                   |                    |
|      | 2.66E-04  |                   |                    |
|      | 3.00E-04  |                   |                    |
| 6.50 | 2.67E-04  | 2.65E-04          | 6.03E-06           |
|      | 2.56E-04  |                   |                    |
|      | 2.70E-04  |                   |                    |
|      | 2.65E-04  |                   |                    |
| 7.00 | 2.46E-04  | 2.51E-04          | 1.05E-05           |
|      | 2.55E-04  |                   |                    |
|      | 2.39E-04  |                   |                    |
|      | 2.63E-04  |                   |                    |
| 7.50 | 3.05E-04  | 2.58E-04          | 3.61E-05           |
|      | 2.68E-04  |                   |                    |
|      | 2.26E-04  |                   |                    |
|      | 2.34E-04  |                   |                    |
| 8.00 | 2.83E-04  | 2.60E-04          | 2.02E-05           |
|      | 2.52E-04  |                   |                    |
|      | 2.45E-04  |                   |                    |
| 8.50 | 2.60E-04  | 2.70E-04          | 2.36E-05           |
|      | 2.53E-04  |                   |                    |
|      | 2.97E-04  |                   |                    |

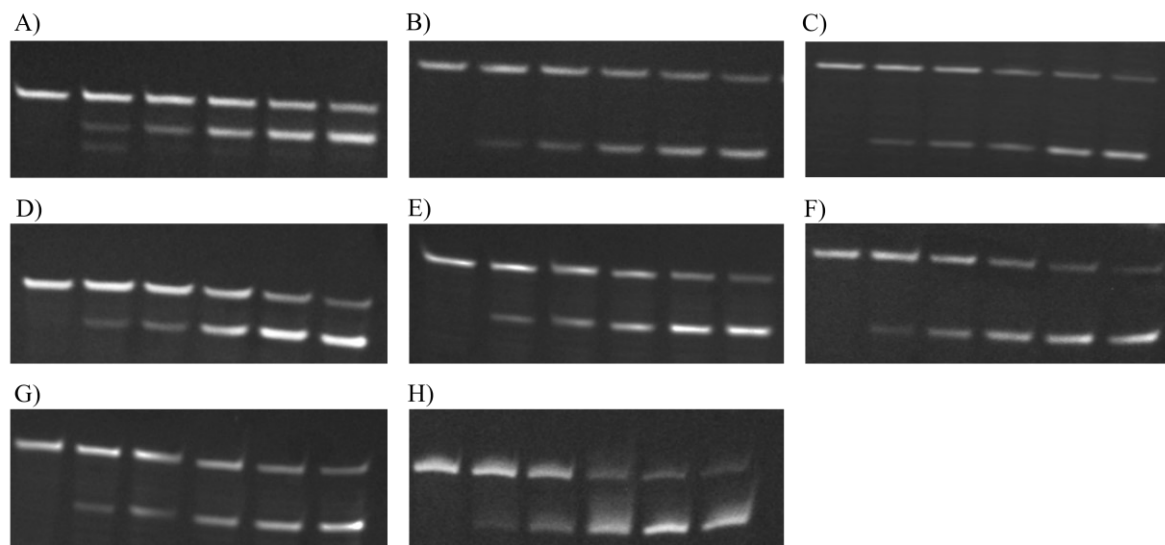

**Figure S7.** Representative PAGE image of activity assays of the 10-23 G14AP DNAzyme variant with its 5'-FAM labelled substrate with 25  $\mu\text{M}$   $\text{Pb}^{2+}$ , measured at different pH values. A) pH 7.5, B) 7.25, C) 7.0, D) 6.5, E) 6.0, F) 5.75, G) 5.5 and H) 5.0.

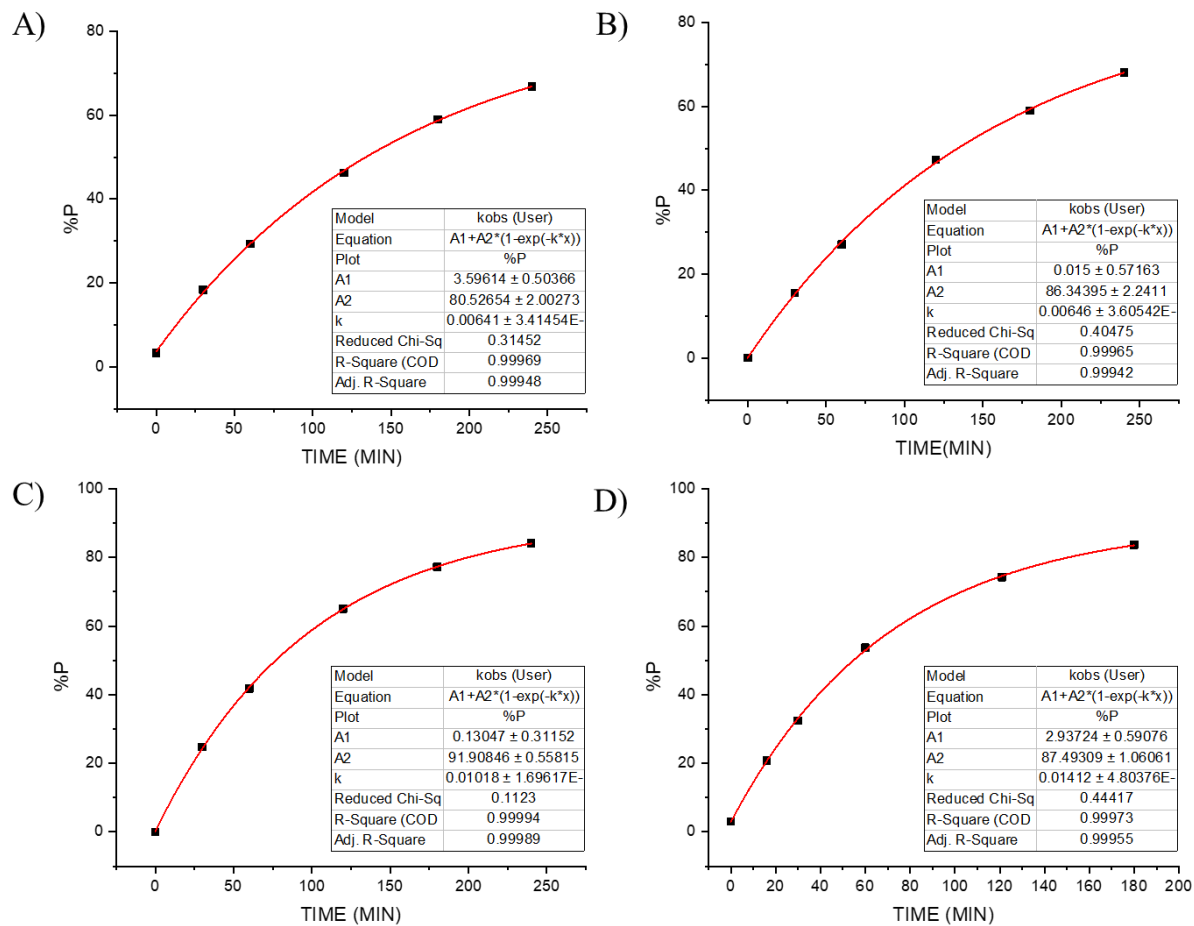

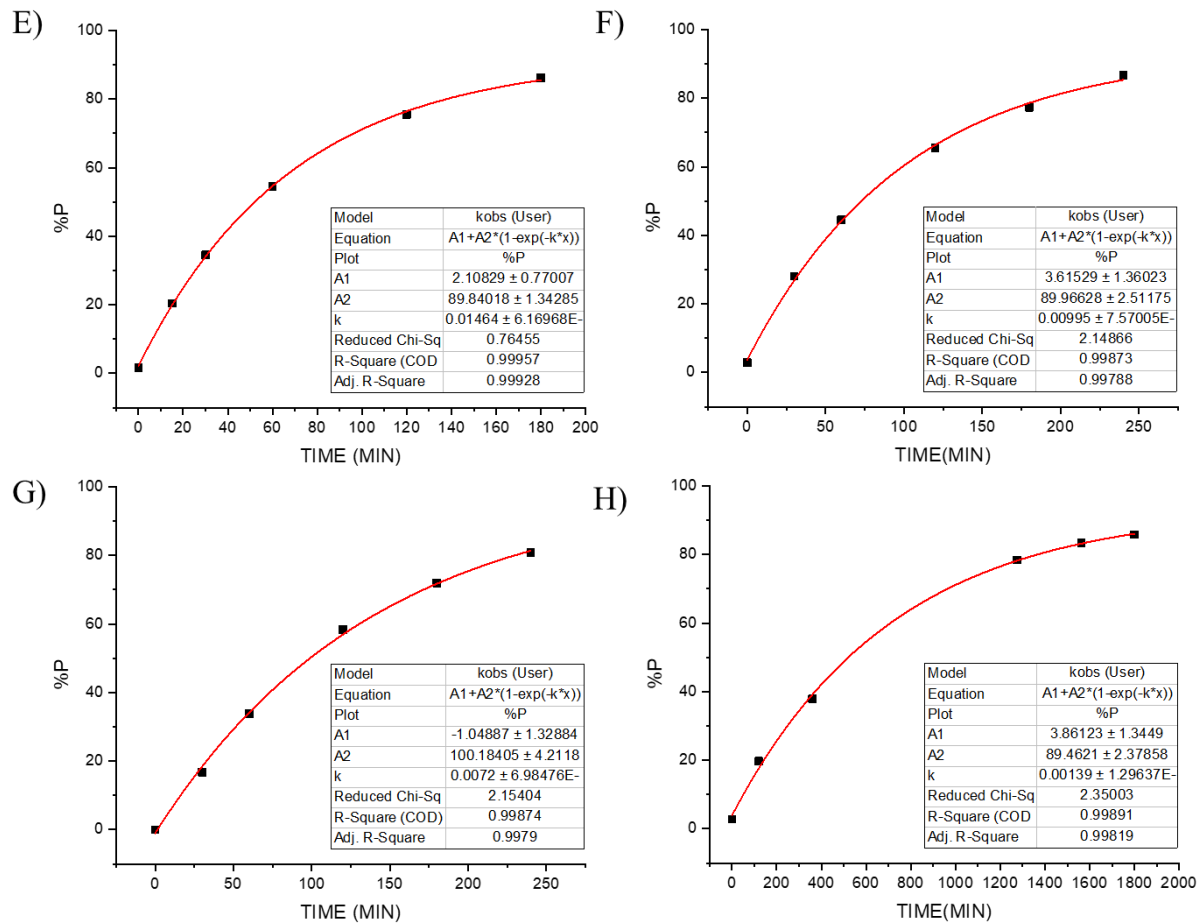

**Figure S8.** Representative activity assays of the 10-23 G14AP DNAzyme variant with its 5'-FAM labelled substrate with 25  $\mu\text{M}$   $\text{Pb}^{2+}$ , measured at different pH values. Every point is calculated as the % of product formed for each time collected. Data are quantified from the PAGE image shown in Figure S7. A) pH 7.5, B) 7.25, C) 7.0, D) 6.5, E) 6.0, F) 5.75, G) 5.5 and H) 5.0.

**Table S4.** Observed rate constant of the 10-23 G14AP DNase variant in presence of 25  $\mu\text{M}$   $\text{Pb}^{2+}$ , measured at different pH values. Average value and standard deviation are provided.

| <b>pH</b> | <b>k<sub>obs</sub></b> | <b>Average k<sub>obs</sub></b> | <b>Standard deviation</b> |
|-----------|------------------------|--------------------------------|---------------------------|
| 5.00      | 0.00133                | 0.00130                        | 0.000104                  |
|           | 0.00116                |                                |                           |
|           | 0.00139                |                                |                           |
|           | 0.00123                |                                |                           |
|           | 0.00140                |                                |                           |
| 5.50      | 0.00720                | 0.00880                        | 0.00140                   |
|           | 0.00978                |                                |                           |
|           | 0.00942                |                                |                           |
| 5.75      | 0.00995                | 0.01023                        | 0.000671                  |
|           | 0.00941                |                                |                           |
|           | 0.01073                |                                |                           |
|           | 0.01082                |                                |                           |
| 6.00      | 0.01464                | 0.01185                        | 0.00238                   |
|           | 0.01140                |                                |                           |
|           | 0.01246                |                                |                           |
|           | 0.00890                |                                |                           |
| 6.50      | 0.01131                | 0.01203                        | 0.00140                   |
|           | 0.01144                |                                |                           |
|           | 0.01412                |                                |                           |
|           | 0.01124                |                                |                           |
| 7.00      | 0.01077                | 0.01052                        | 0.000487                  |
|           | 0.01004                |                                |                           |
|           | 0.01018                |                                |                           |
|           | 0.01107                |                                |                           |
| 7.25      | 0.00663                | 0.00762                        | 0.00107                   |
|           | 0.00646                |                                |                           |
|           | 0.00903                |                                |                           |
|           | 0.00806                |                                |                           |
|           | 0.00794                |                                |                           |
| 7.50      | 0.00641                | 0.00586                        | 0.000867                  |
|           | 0.00583                |                                |                           |
|           | 0.00464                |                                |                           |
|           | 0.00654                |                                |                           |

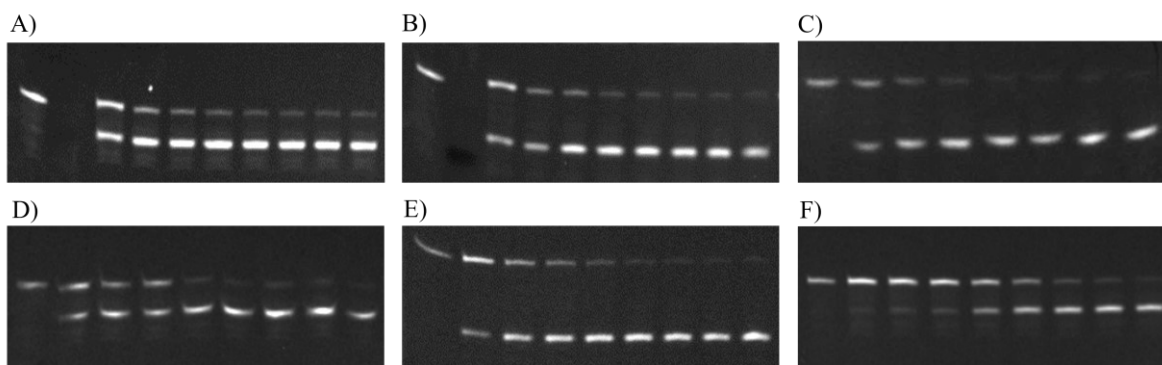

**Figure S9.** Representative PAGE image. Activity assays of the 10-23 DNase with its 5'-FAM labelled substrate with A) 400  $\mu M$   $Pb^{2+}$ , B) 250  $\mu M$   $Pb^{2+}$ , C) 150  $\mu M$   $Pb^{2+}$ , D) 75  $\mu M$   $Pb^{2+}$ , E) 25  $\mu M$   $Pb^{2+}$  and F) 10  $\mu M$   $Pb^{2+}$ .

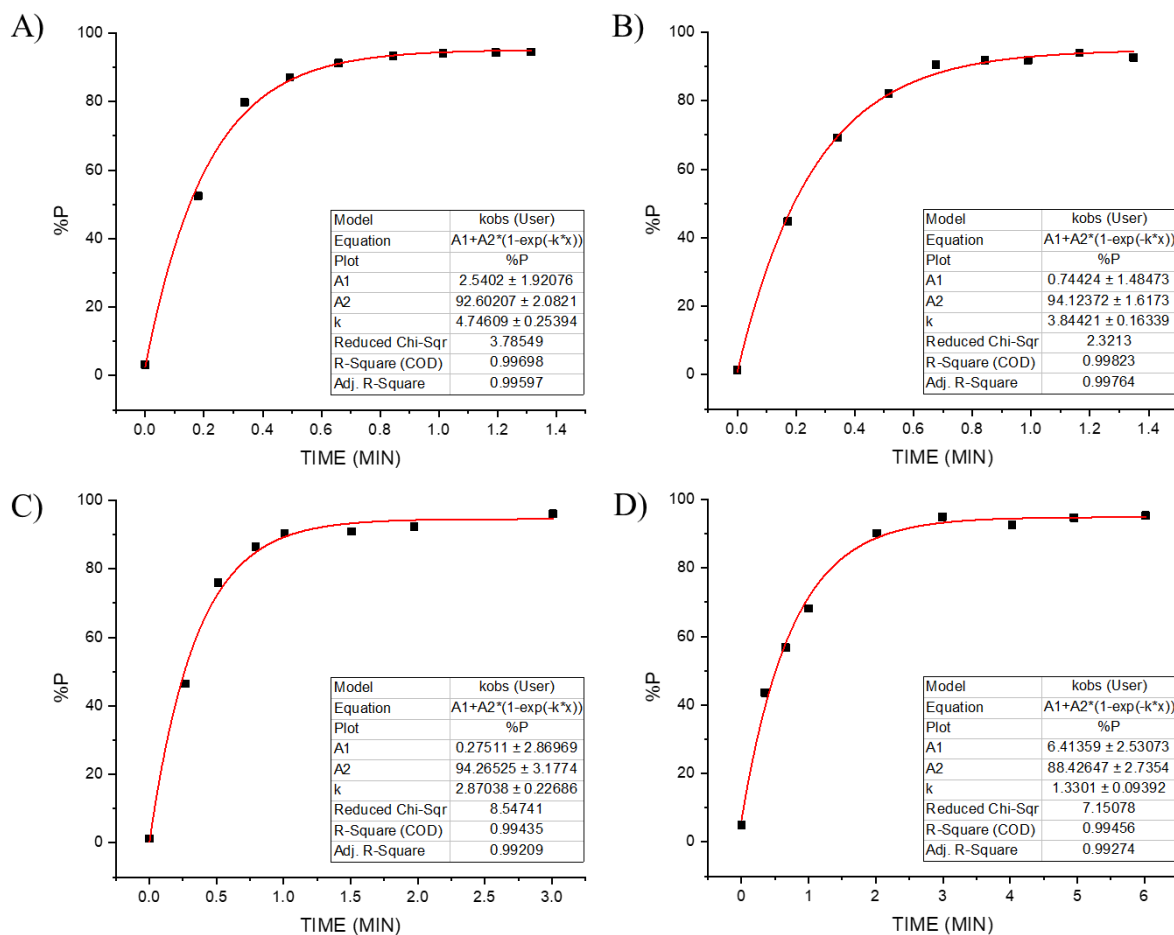

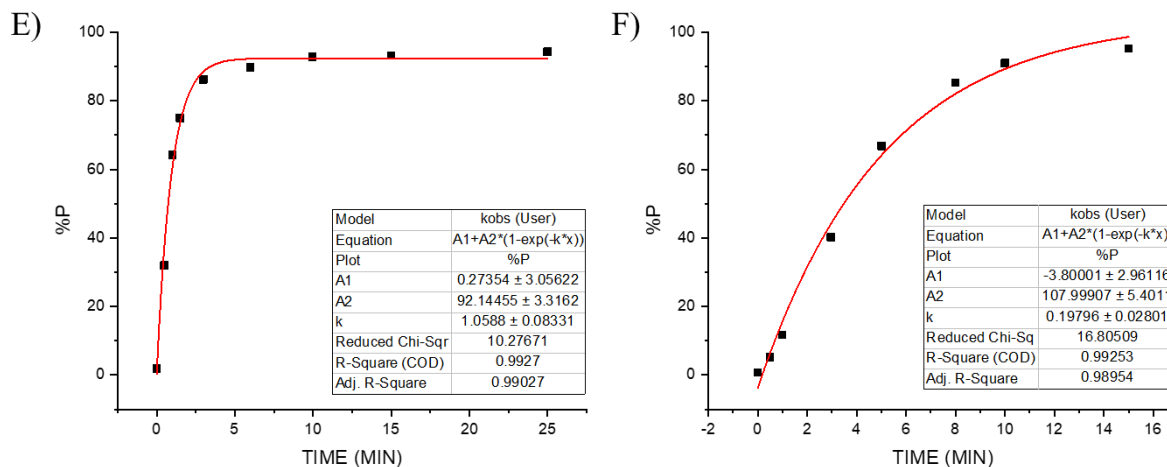

**Figure S10.** Representative activity assays of the 10-23 DNase with its 5'-FAM labelled substrate at pH 6.0, measured at different Pb<sup>2+</sup> concentration values. Every point is calculated as the % of product formed for each time collected. Data are quantified from the PAGE image shown in Figure S9. A) 400 μM Pb<sup>2+</sup>, B) 250 μM Pb<sup>2+</sup>, C) 150 μM Pb<sup>2+</sup>, D) 75 μM Pb<sup>2+</sup>, E) 25 μM Pb<sup>2+</sup> and F) 10 μM Pb<sup>2+</sup>.

**Table 1.** Observed constant rate as a function of the Pb<sup>2+</sup> concentration, measured at pH 6.0. The average and standard deviation are provided.

| [Pb <sup>2+</sup> ] | k <sub>obs</sub> | Average k <sub>obs</sub> | Standard deviation |
|---------------------|------------------|--------------------------|--------------------|
| 400 μM              | 4.13             | 4.44                     | 0.2533             |
|                     | 4.46             |                          |                    |
|                     | 4.44             |                          |                    |
|                     | 4.75             |                          |                    |
| 250 μM              | 4.01             | 3.93                     | 0.1202             |
|                     | 3.84             |                          |                    |
| 150 μM              | 2.85             | 2.87                     | 0.0153             |
|                     | 2.87             |                          |                    |
|                     | 2.88             |                          |                    |
| 75 μM               | 1.14             | 1.93                     | 0.6225             |
|                     | 1.33             |                          |                    |
|                     | 2.01             |                          |                    |
|                     | 2.78             |                          |                    |
|                     | 2.40             |                          |                    |
| 25 μM               | 1.26             | 1.14                     | 0.0823             |
|                     | 1.23             |                          |                    |
|                     | 1.10             |                          |                    |
|                     | 1.06             |                          |                    |
|                     | 1.11             |                          |                    |
|                     | 1.09             |                          |                    |
| 10 μM               | 0.27             | 0.29                     | 0.1042             |
|                     | 0.44             |                          |                    |
|                     | 0.20             |                          |                    |
|                     | 0.25             |                          |                    |
